# Supplementary material for: Revisiting NH3–catalyst interactions in Cu-SSZ-13 SCR catalysts: an in situ spectro-kinetics study
Source: Royal Society of Chemistry journal article supplement (doi:10.1039/d2cy00805j), 2022-01-01
Supplement: d2cy00805j1.pdf [file d2cy00805j1.pdf]

## **Revisiting NH<sub>3</sub> — Catalyst Interactions in Cu-SSZ-13 SCR Catalysts: An In-situ Spectro-Kinetics Study**

Daniyal Kiani \*, Yuanzhou Xi, Nathan Ottinger, Z. Gerald Liu

Cummins Emission Solutions, 1801 US Hwy 51/138, Stoughton, WI, 53589, USA

\*corresponding author: [daniyal.kiani@cummins.com](mailto:daniyal.kiani@cummins.com),; ORCID: 0000-0002-9748-3007

Electronic Supplemental Information

**Table S 1.** IR band assignments from the literature for  $\text{NH}_3$  adsorbed on relevant catalytic systems.

| Catalyst       | IR band ( $\text{cm}^{-1}$ )                            | Assignment                                                        | Ref |
|----------------|---------------------------------------------------------|-------------------------------------------------------------------|-----|
| Cu-SAPO-34     | 1460, 3283, 3333                                        | $\text{NH}_4^+$                                                   | 1   |
| Cu-SAPO-34     | 1617, 3182, 3383                                        | $\text{NH}_3$                                                     |     |
| Cu-SSZ-13      | 1454, 3262                                              | $\text{NH}_4^+$                                                   | 2   |
| Cu-SSZ-13      | 1620, 3182, 3352                                        | $\text{NH}_3$                                                     |     |
| Cu-SSZ-13      | 3728                                                    | Si-OH                                                             |     |
| Cu-SSZ-13      | 3610                                                    | Si-OH-Al                                                          |     |
| Cu-SSZ-13      | 1449, 1493, 3273, 3355                                  | $\text{NH}_4^+$                                                   | 3   |
| Cu-SSZ-13      | 1270, 1617, 3181                                        | $\text{NH}_3$                                                     |     |
| Cu-SSZ-13      | 3682                                                    | Si-OH                                                             |     |
| Cu-SSZ-13      | 3600                                                    | Si-OH-Al                                                          |     |
| Cu-SSZ-13      | 1449, 1493, 3273, 3355                                  | $\text{NH}_4^+$                                                   | 4   |
| Cu-SSZ-13      | $\delta_s$ (1150-1270), $\delta_{as}$ (1617-1624), 3181 | $\text{NH}_3$                                                     |     |
| Cu-SSZ-13      | ~3730-3750                                              | Si-OH                                                             |     |
| Cu-SSZ-13      | ~3600                                                   | Si-OH-Al                                                          |     |
| Cu-SSZ-13      | 3650                                                    | -Cu-OH                                                            |     |
| Cu-SSZ-13      | 3520, 3440, 1550-1510                                   | - $\text{NH}_2$                                                   |     |
| Cu-SSZ-13      | 1700, 2770                                              | $\text{NH}_4^+$ , $n\text{NH}_3$                                  |     |
|                | 3375                                                    | Free NH stretching in $\text{NH}_3$                               | 5   |
|                | 3090-3155, 2875-2865                                    | Evans windows; overtones of ~1450 and combination of ~1450, ~1650 |     |
|                | 3383                                                    | -stretching of free NH in $\text{N}_2\text{H}_7^+$                |     |
|                | 1700                                                    | Bending of h bonded N-H in $\text{N}_2\text{H}_7^+$               |     |
| $\text{SiO}_2$ | 3526                                                    | N-H stretching in Si-O- $\text{NH}_2$                             | 6   |

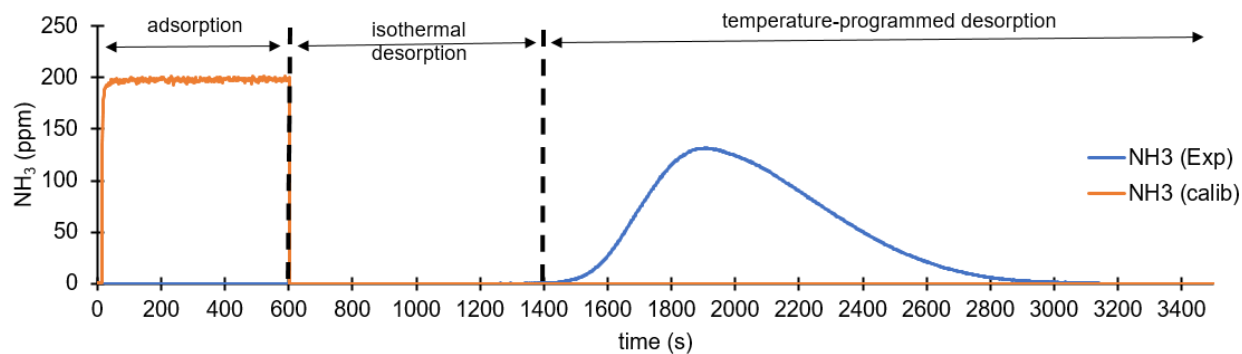

**Figure S 1.** Representative  $\text{NH}_3$  traces on pilot-reactor rig during 600s long adsorption step at  $120^\circ\text{C}$ , followed by 900s isothermal desorption step at  $120^\circ\text{C}$ , and finally by a TPD step from  $120^\circ\text{C}$  to  $650^\circ\text{C}$  at  $10^\circ\text{C}/\text{min}$  ramp rate. As described in eq (7) in the main text,  $\text{NH}_3$  adsorbed/desorbed in each step is quantified by calculating the difference in areas under the blue (exp) and the orange (calibration) traces.

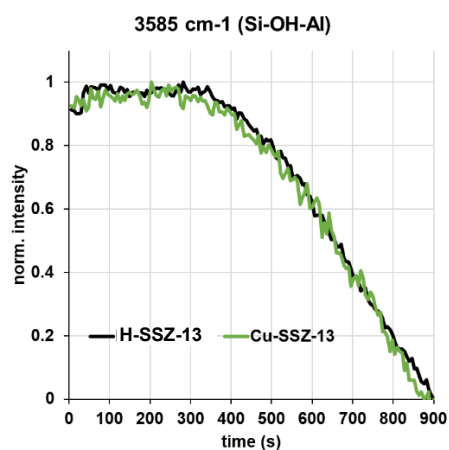

**Figure S 2.** normalized band intensities for O-H stretching of the BAS in SSZ-13 catalysts, corroborating the lack of BAS consumption in the first  $\sim 300\text{s}$  of  $\text{NH}_3$  adsorption.

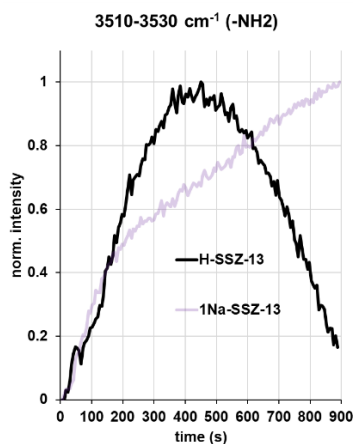

**Figure S 3.** normalized band intensities for the  $\text{NH}_2$  transient species observed in SSZ-13-based catalysts during  $\text{NH}_3$  adsorption. Black lines correspond to H-SSZ-13, while purple lines to 1% Na-impregnated sample 1Na-SSZ-13. In both cases, catalyst was cleaned and dehydrated at  $500^\circ\text{C}$  for 1 hr in 10%  $\text{O}_2/\text{Ar}$  mixture before cooling down to  $120^\circ\text{C}$ , and conducting  $\text{NH}_3$  adsorption according to protocol outlines in **Figure 4 main section**.

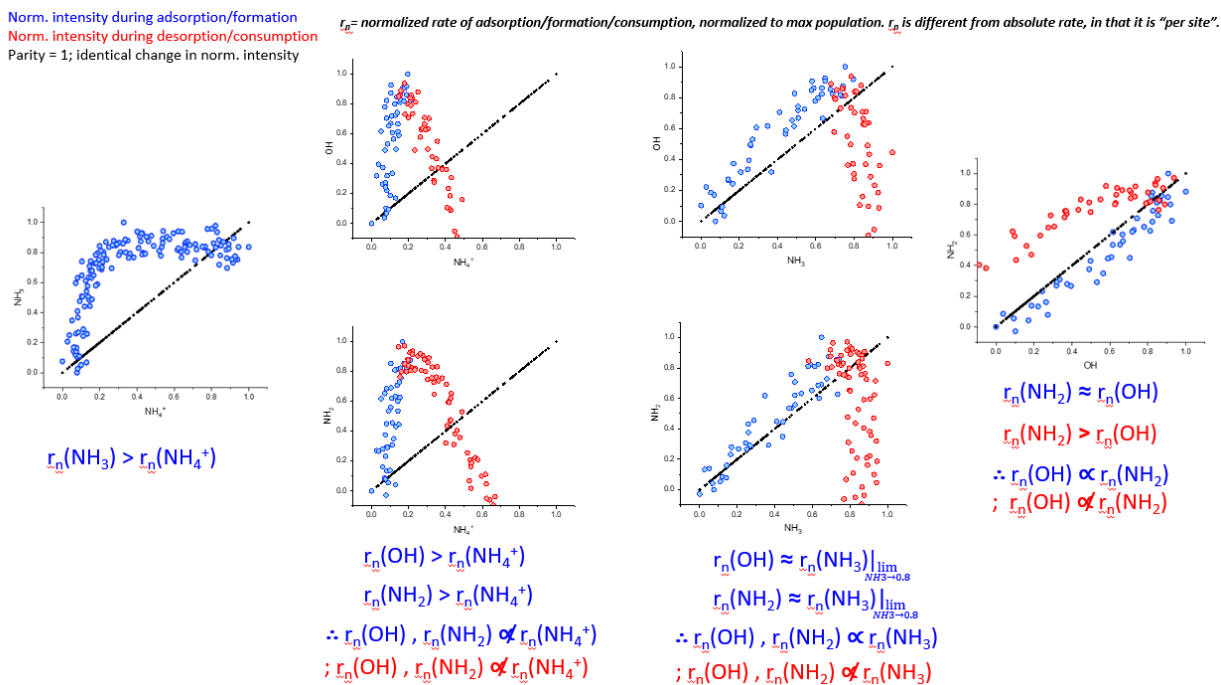

**Figure S 4.** Parity plot analysis of normalized intensities of various IR bands in Cu-SSZ-13 during  $\text{NH}_3$  adsorption. For the two transient species ( $\text{NH}_2$ ,  $\text{OH}$ ), the blue dots correspond to the time frame during which intensity of the respective bands was increasing, while red dots represent the time range when intensities decreased. The black dotted line signifies parity case i.e 1:1 evolution of the bands on x- and y-axes.

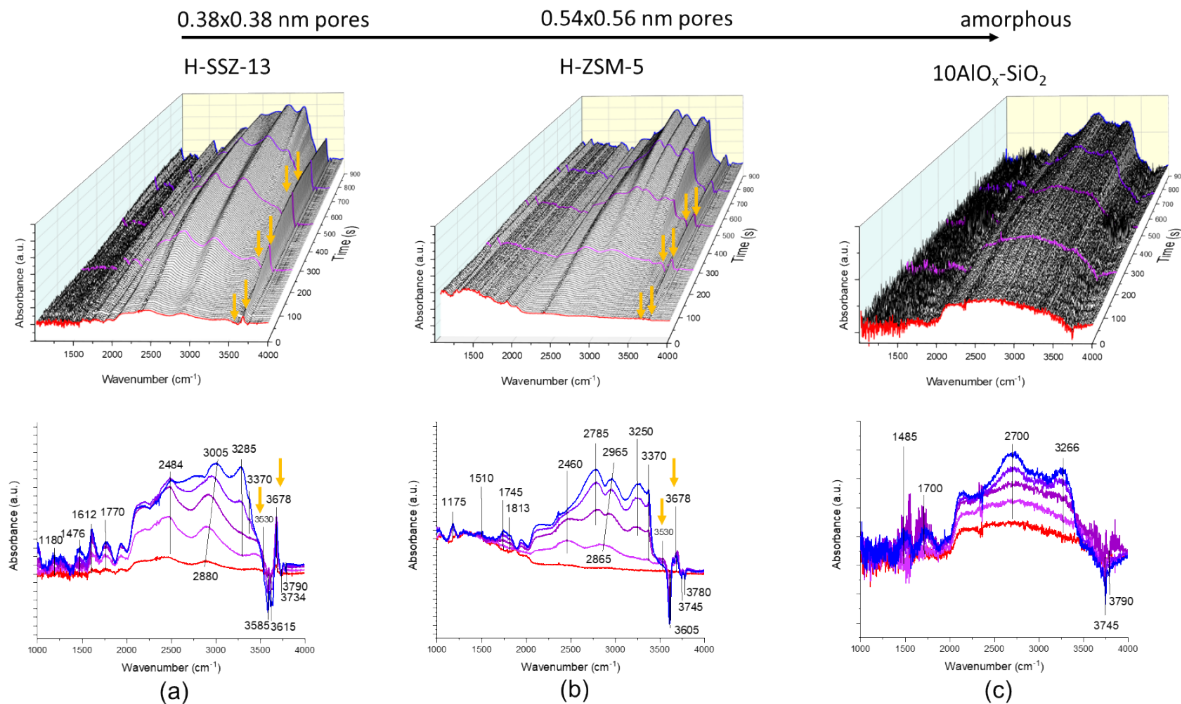

**Figure S 5.** temporally resolved in-situ DRIFTS during  $\text{NH}_3$  adsorption on (a) H-SSZ-13 (SAR 15), (b) H-ZSM-5 (SAR 15), (c) 10% $\text{AlO}_x\text{-SiO}_2$  samples, indicating that  $\text{NH}_2$  and O-H bands (marked with yellow arrows) from  $\text{NH}_3$  dissociation only evolve in the two zeolitic samples.

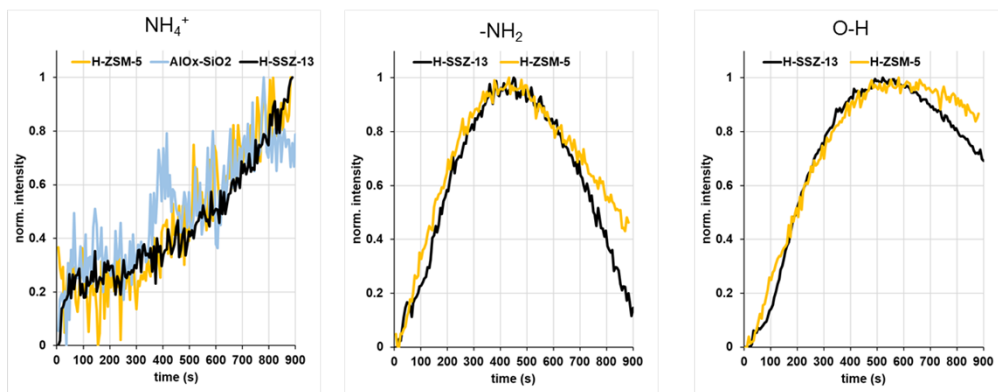

**Figure S 6.** Evolution of normalized IR band intensities of BAS-bound  $\text{NH}_4^+$ ,  $\text{NH}_2$  and O-H intermediates in H-SSZ-13, H-ZSM-5, and amorphous 10%  $\text{AlO}_x\text{-SiO}_2$ . All samples exhibit  $\text{NH}_4^+$  formation, but only the two zeolites exhibit  $\text{NH}_2$  and O-H bands during  $\text{NH}_3$  adsorption.

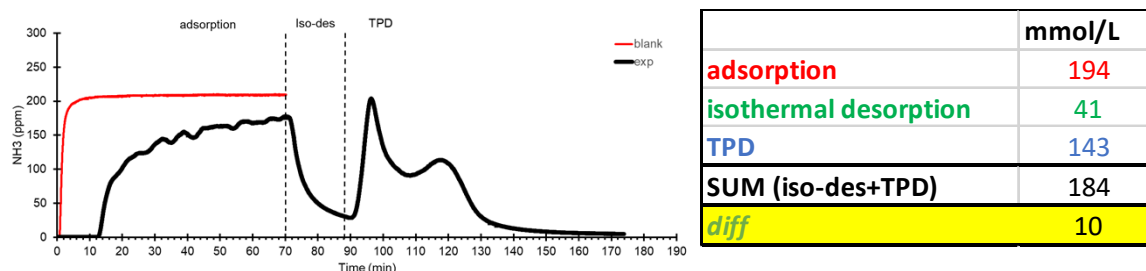

**Figure S 7.** Proof-of-concept  $\text{NH}_3$  TPD on H-SSZ-13 powder diluted in cordierite (25% zeolite, 75% cordierite) to mimic wash-coated monolith type Cu-SSZ-13 pilot core tested in the study. Our results indicate  $\sim 10 \text{ mmol}_{\text{NH}_3} \text{ L}^{-1} \text{ cat}$  was consumed over H-SSZ-13, where the total adsorbed  $\text{NH}_3$  capacity was  $\sim 193 \text{ mmol}_{\text{NH}_3} \text{ L}^{-1} \text{ cat}$ . It suffices to note that to first approximation, the  $\text{NH}_3$  consumed over Cu-SSZ-13 is approximately twice more than over H-SSZ-13, corroborating our DRIFTS results that  $\text{NH}_3$  dissociates faster on Cu-SSZ-13 than H-SSZ-13. The  $\text{NH}_3$  TPD was carried out in a micro reactor employing quartz 0.25" ID quartz tube. Experimental conditions were kept reasonably close to the pilot reactor study:  $\sim 40,000 \text{ hr}^{-1} \text{ SV}$ ,  $\sim 200 \text{ ppm NH}_3$ ,  $10^\circ\text{C/min}$  ramp rate during TPD. Adsorption was conducted at  $120^\circ\text{C}$ , followed by isothermal desorption at  $120^\circ\text{C}$ , and finally by TPD under  $\text{N}_2$  flow from  $120^\circ\text{C}$  to  $600^\circ\text{C}$ .

## References

- (1) Wang, D.; Zhang, L.; Kamasamudram, K.; Epling, W. S. In Situ-DRIFTS Study of Selective Catalytic Reduction of  $\text{NO}_x$  by  $\text{NH}_3$  over Cu-Exchanged SAPO-34. *ACS Catal.* **2013**, 3 (5), 871–881. <https://doi.org/10.1021/cs300843k>.
- (2) Zhu, H.; Kwak, J. H.; Peden, C. H. F. F.; Szanyi, J. In Situ DRIFTS-MS Studies on the Oxidation of Adsorbed  $\text{NH}_3$  by  $\text{NO}_x$  over a Cu-SSZ-13 Zeolite. *Catal. Today* **2013**, 205 (x), 16–23. <https://doi.org/https://doi.org/10.1016/j.cattod.2012.08.043>.
- (3) Ma, L.; Cheng, Y.; Cavataio, G.; McCabe, R. W.; Fu, L.; Li, J. In Situ DRIFTS and Temperature-Programmed Technology Study on  $\text{NH}_3$ -SCR of  $\text{NO}_x$  over Cu-SSZ-13 and Cu-SAPO-34 Catalysts. *Appl. Catal. B Environ.* **2014**, 156–157, 428–437. <https://doi.org/10.1016/j.apcatb.2014.03.048>.
- (4) Giordanino, F.; Borfecchia, E.; Lomachenko, K. A.; Lazzarini, A.; Agostini, G.; Gallo, E.; Soldatov, A. V.; Beato, P.; Bordiga, S.; Lamberti, C. Interaction of  $\text{NH}_3$  with Cu-SSZ-13 Catalyst: A Complementary FTIR, XANES, and XES Study. *J. Phys. Chem. Lett.* **2014**, 5 (9), 1552–1559. <https://doi.org/10.1021/jz500241m>.
- (5) Zecchina, A.; Marchese, L.; Bordiga, S.; Pazè, C.; Gianotti, E. Vibrational Spectroscopy of  $\text{NH}_4^+$  Ions in Zeolitic Materials: An IR Study. *J. Phys. Chem. B* **1997**, 101 (48), 10128–10135. <https://doi.org/10.1021/jp9717554>.
- (6) Peri, J. B. Infrared Study of OH and  $\text{NH}_2$  Groups on the Surface of a Dry Silica Aerogel. *J. Phys. Chem.* **1966**, 70 (9), 2937–2945. <https://doi.org/10.1021/j100881a037>.
- (7) Greenaway, A. G.; Marberger, A.; Thetford, A.; Lezcano-González, I.; Agote-Arán, M.; Nachttegaal, M.; Ferri, D.; Kröcher, O.; Catlow, C. R. A.; Beale, A. M.

Detection of Key Transient Cu Intermediates in SSZ-13 during NH<sub>3</sub>-SCR DeNO<sub>x</sub> by Modulation Excitation IR Spectroscopy. *Chem. Sci.* **2020**, *11* (2), 447–455.  
<https://doi.org/10.1039/c9sc04905c>.
